# Supplementary material for: Excellent low temperature performance for total benzene oxidation over mesoporous CoMnAl composited oxides from hydrotalcites
Source: Royal Society of Chemistry journal article supplement (doi:10.1039/c6ta02593e), 2016-01-01
Supplement: c6ta02593e1.pdf [file c6ta02593e1.pdf]

## Supporting Information

### Excellent low temperature performance for total benzene oxidation over mesoporous CoMnAl composited oxides from hydrotalcites

Shengpeng Mo<sup>ab</sup>, Shuangde Li<sup>a</sup>, Wenhui Li<sup>ab</sup>, Jiaqi Li<sup>ab</sup>, Jiayuan Chen<sup>ab</sup>, Yunfa Chen<sup>a,\*</sup>

<sup>a</sup> State Key Laboratory of Multi-phase Complex Systems, Institute of Process Engineering,

Chinese Academy of Sciences, Beijing 100190, PR China

<sup>b</sup> University of Chinese Academy of Sciences, Beijing 100049, PR China

#### CORRESPONDING AUTHOR FOOTNOTE:

\* Corresponding author E-mail: yfchen@ipe.ac.cn, chenyf@ipe.ac.cn. Tel.: +86 10 8254 4896; fax: +86 10 8254 4896.

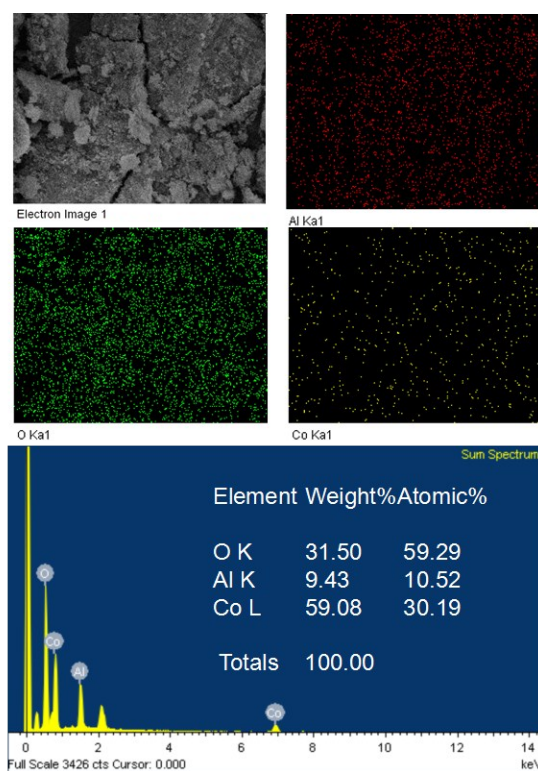

**Fig.S1** SEM image, element distribution and EDX data of the Co<sub>3</sub>AlO sample.

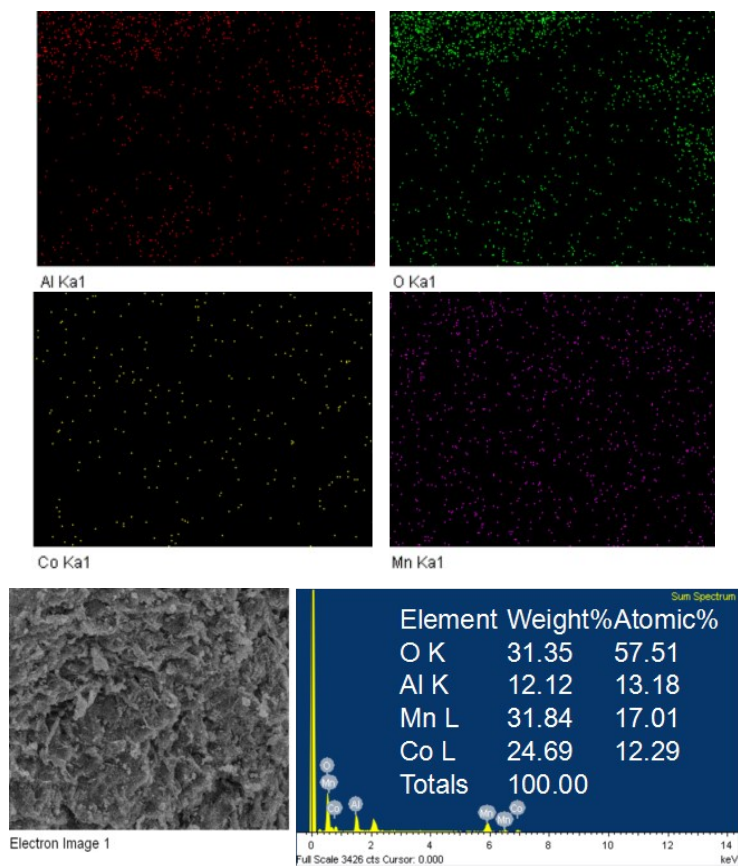

**Fig.S2** SEM image, element distribution and EDX data of the CoMn<sub>2</sub>AlO sample.

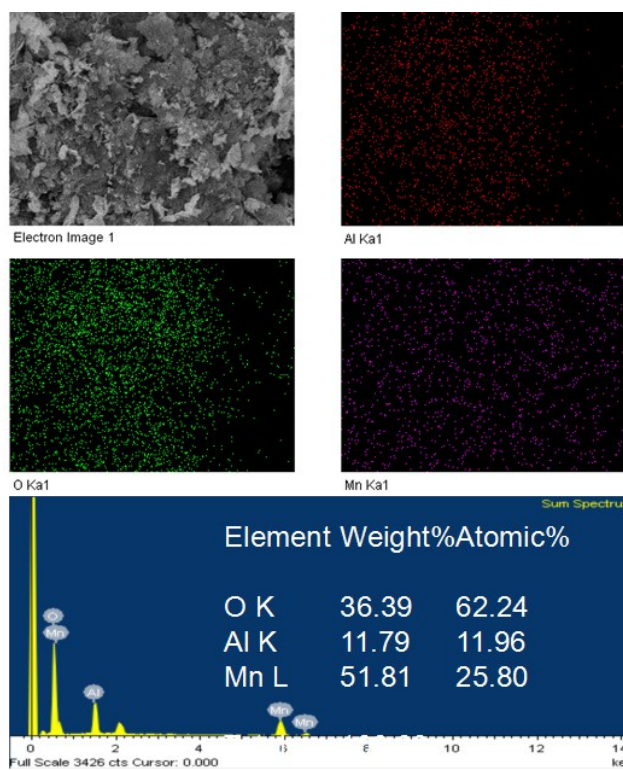

**Fig.S3** SEM image, element distribution and EDX data of the Mn<sub>3</sub>AlO sample.

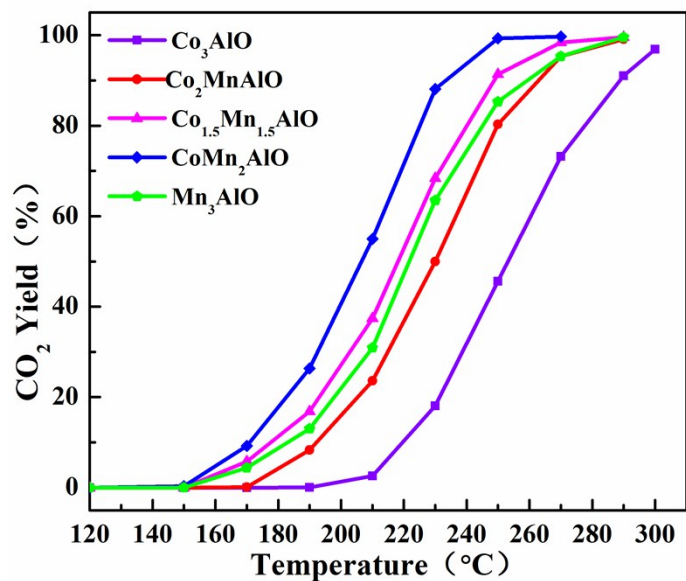

Fig.S4 CO<sub>2</sub> yield as a function of reaction temperature over the Co<sub>3-x</sub>Mn<sub>x</sub>AlO catalysts.

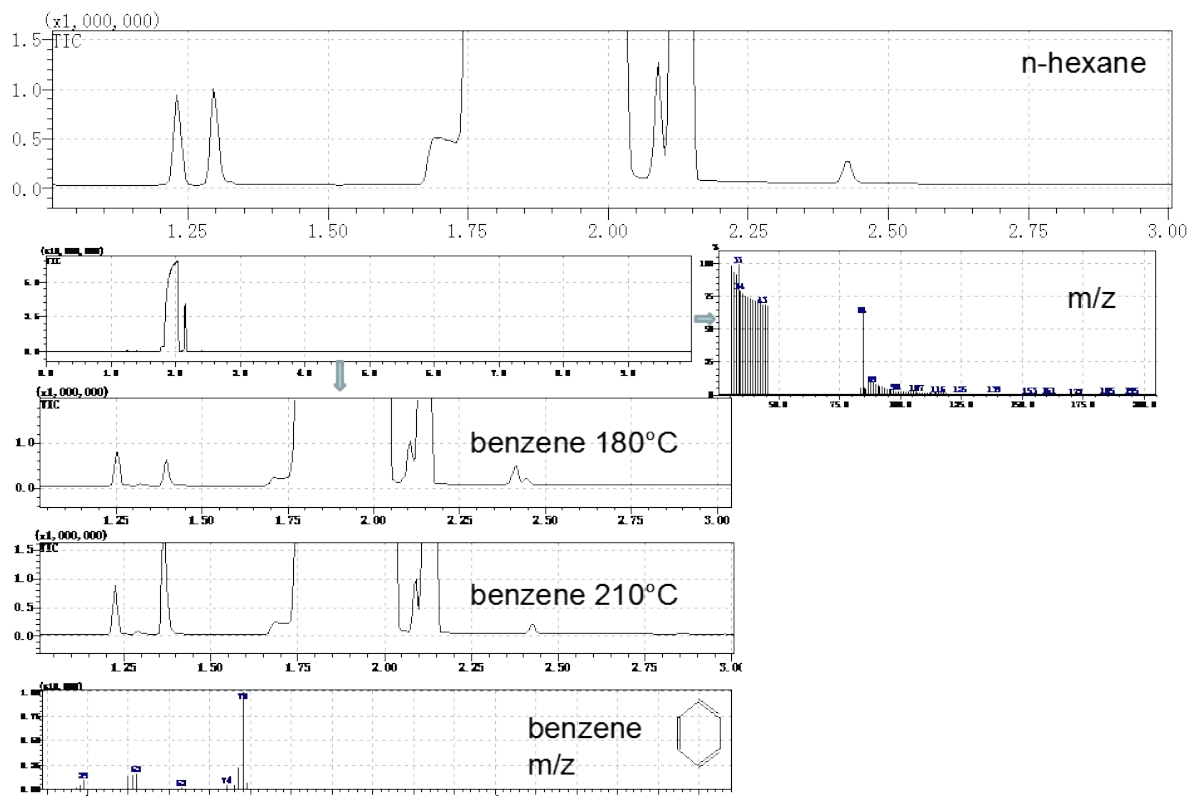

Fig.S5 Analysis of exhausted gas by GC-MS over CoMn<sub>2</sub>AlO-550 catalyst.
